# Supplementary material for: Preparation of a liquefied banana pseudo-stem based PVAc-nanosilica hybrid membrane and its modification by octadecyltrichlorosilane
Source: Royal Society of Chemistry journal article supplement (doi:10.1039/c6ra20154g), 2016-01-01
Supplement: c6ra20154g1.pdf [file c6ra20154g1.pdf]

## Preparation of Liquefied Banana Pseudo-stem based PVAc-Nanosilica Hybrid Membrane and Its Modification by Octadecyltrichlorosilane

MENG Fan-rong, ZHANG Yu-cang \*, LI Ji-hui, FU Wen-xing, ZHANG Jie

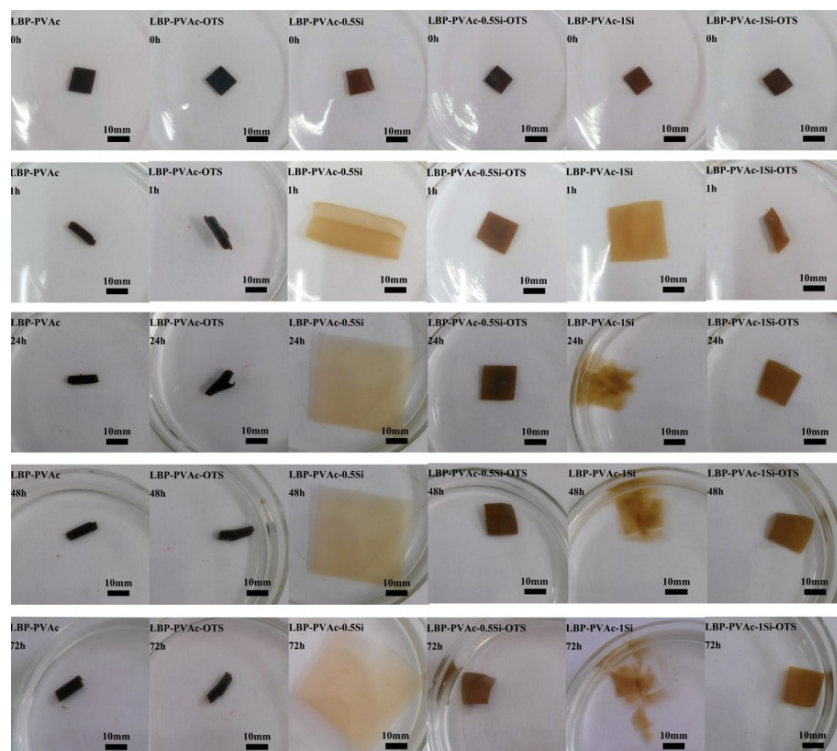

**Figure S1.** Photograph images of LBP-PVAc nanocomposite membranes immersing in water for 0 h, 1 h, 24 h, 48 h and 72 h, respectively

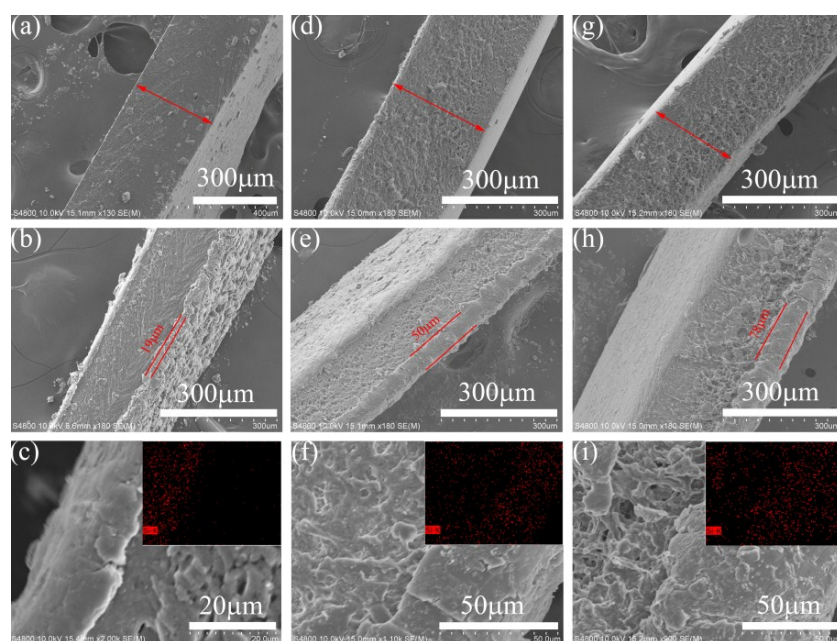

**Figure S2.** SEM images of the membrane cross-section. (a) LBP-PVAc; (b, c) LBP-PVAc-OTS; (d) LBP-PVAc-0.5Si; (e, f) LBP-PVAc-0.5Si-OTS; (g) LBP-PVAc-1Si; (h, i) LBP-PVAc-1Si-OTS; The insets in (c, f, i) are the Si mappings of the corresponding membranes
